# Supplementary material
Source: PubMed Central journal article supplement (PMC2323319)
Supplement: pgen.0030237.sd001.pdf [file pgen.0030237.sd001.pdf]

>Macaque WASH

MTPVRTQHSLAGQTYAVPLIQPDLRREEAVQQMADALQHLQKVSQDIFSR  
ISQRVEQSRNQVQAIQEKVSLAQAKIEKIKGSKKAIKVFSSAKYPAPE  
RLQEYGSIFTGAQDPGPQRRPRHRIQSKHRPLDERALQ  
EKLYFPVCVSAKLEPEDDAEGLGGLPSNISSVSSLLLF  
NTTENLYKKYVFLDPLAGAVTKTHVMLGAETEEKLFD  
APLSISKREQLEQQVPENYFYVPDLGQVPEIDVPSYLPDLPGIAN  
DLMYSADLPGIAPSAPGTIPELPTFHTEVAEPLKSDLQDGVLT  
APPPPPPPPPPPAPEVLASAPPLPPSTA  
APVQGGGRQDNSSASPSVQVQAPKEVDPSSGRATLLEST  
RQAGGIGKAKLRSVKERKLEKKKQKEQEQVRA  
TSQGGDLMSDLFNKLVMRRKGISGKGPAGGEGPGGAFARVSD  
SIPPLPPPQQPAEEDDDWES

>Opossum WASH

MTQSLYLEGQAYSVPLIQPDLRREEAIQQVADALQYLQKVSQDIFSR  
ISQRVETSRSQLQVIGERSLAQAKIEKIKGSKKAIKVFSSAKYPAPD  
RLQEYNSIFTGAQDPGFQRRIRHKVQSKHRPLDERALQ  
EKLYFPVCVSTRPQPEDEAEGLGGLPSNINSLSSLLLF  
NTTENLYKKYVFLDPLAGAVTKTHVTLGTETEKLFD  
APLSISKREQLEQQVAENYFYVPDLGQVPEIDVPSYLPDLPGIAD  
DLMYSADLPGIAPSAPGTIPELPTFNTELAEPFKPELDDDVLV  
APPPPPPPPPPPAPEVSVSAPPPPLPQ  
LTSAPASVDSSSVSPSVHVPKEVDPSSGRATLLEST  
RQAGGIGKAKLRSVKERKLEKKKQKEQEQVRA  
TSQGGDLMSDLFNKLVMRRKGISGKGPAGANTGEGPGGAFARMSD  
SIPPLPMLQQPPGEEDEDEWES

>Fugu WASH

MTHKHYLEGQVYSVPLIQPDLRREEAVHQIADALLYLETISTDIFRR  
QVSDSVEKNRHLQRIQDRIRLAQARVDKIKGSKKATKVFSSAKYPAPD  
RLQDYSSIFTEATDPSSHIRPRHRIRNKHRPFDEKALQ  
DKLVYYPVCVSRKKKSEDETEEGLGSLPRNISSVSSLLLF  
NTTENLYKKYVFLDPLAGAVTKHTTLETEKEEKPF  
APLSIAKREQLERQTAESYFYVPDLGQVPEIDVPTYLPDLPGIAD  
DLSYNADLPGFAPSGPTHNIPELPSFTEESSLPQSLLQ  
PNVPPPPPPPPPEPVATAATAGALPPPPP  
PPPPPPPPVEVAQAPSSGPVSGAPTEVVQPSDGRASLLEST  
RNAGVIGKAKLRNMKERKMEKKKQKEQEQAVGV  
ASSGGDFMSDLFNKLAMRRKGISGKGPAGSEASDAPASTGGAFARMSD  
VIPPLPAPHSTDDDDWEA

>Anopheles WASH

MHTYSVPIVKHDIRHEETILDAINAFEYLNQVVEDVFGK  
INARIERNRARLEAIDGRVEQVSASVRKLHETKQAIIIYSPSRYPAD

VDPTIEPTFTPTNGIALAECHFRLRDKPYLPSHSLQ  
EKIQFYHVKSPRESERIFPFESAPARSGSGSLQGRGLGPFLDTLLLF  
SEPAYVQQYRGQDWKRPVRKSSSHAVGGIREEKVLS  
SSSPIIRSRMKKKSQDIFYTPSLNDAPKLDVPIDLPDLPGIVS  
NINYVGNSTLIAPSLQLAGIIEQLPSLEDL TSAIDVADHHSK  
EKKVGETPPPPPPPPPPPPPP  
QPVVETATAPATSKPEAPKQKEPLPAPAGNAHFNLMEAI  
RRAGGAEKANLRHSDRREGGGGRDGAAS  
SGEPKSLIDDLHNKLQMRKGISGTREPQEPQGNVIDRLSA  
LIPPPAPKLAADASASESNEEDWE

>D.yakuba WASH

MEESPYLHSPYQVAIIATDLHHEDTIIQAAQSLDCLHKTINSIFER  
IDARLARNGSKVEDINNRVKRAQAKIDALVGSKRAIQIFAPARFPASD  
VLAPLPATFPQVAANPLMEQQVDQQPQRPYSSHSPAEEQQDD  
ADIFFHVRDDREQESPLVAERKVTNR TAGL GSLPVGGVRSVPSLMRF  
NTNEFAYGEDLNAWKRS LPPQNARRVASQSARLTAEKQLAP  
APHSLAHGTTKLATPAGDLRYNPAAMAAPAIDVPLDLPDLPGIAN  
DLQYEPVEEKTPIAPSQQFGDLPEL PDLGLEEQEITVQAI AARTHIP  
GPARKKSLGQCSPVMAAPPPPPPPPPPPPPPPPPA  
QTMGIPSPPPFPTKGAVKPLSPSISTPLNMPPPPATEDPRSELMAAI  
RNAGGVHGGRLRSPAAAPLDVVDNTRSKAG  
AAATGDL MADLHNKLMLRRKGISGSQNPGEATAGNPLMQQLSR  
VI PPPVQPRKGSQSSDEAHSEDEDGWN

>D.simulans WASH

MEESPYLHSPYQVAIIATDLHHEDTIIQAAQSLDCLHKTINSIFER  
IDARLARNGSKVEDINNRVKRAQAKIDALVGSKRAIQIFAPARFPASD  
VLAPLPATFPQVAANPLMEQPVEQKPQGSYSSHSPA EHKPDD  
ADIFFHVRGDREQESPLVAERKITNR TAGL GSLPAGGVRSVPSLMRF  
NTNEFAYGEDLNAWKRS LPPQSARRVASQSTQLTVDKQLAP  
APHSLAHGTTKLATPAGDLRYNPAALAAPAIDVPLDLPDLPGIAN  
DLQYEPVEEQTPPIAPSQQFGDLPEL PDLGLEEQVITVQAI AQAATHIP  
GPLRRKSVGQCSPVTAAPPPPPPPPPPPPPPPPPA  
QTNAIPSPPPFPTKGAVKPLSPSLATPLNMPQPPATEDPRSELMAAI  
RNAGGVHGGRLRSPAAAPLDVVDNSRSKAG  
GAATGDL MADLHNKLMLRRKGISGSQNP AEATAGNPLMQQLSR  
VI PPPVQPRKGSQSSGEEHSEDEDGWN

>CfnWASP

MSSGQQQPPPPRRVTNVGSLLLTPQENESLFTFLGKKCV  
TMSSAVVQLYAADRNCMWSKCKSGVACL VKDNPQRSYFLRIFDIKDG  
KLLWEQEL YNNFVYNSPRGYFHTFAGDTCQVALNFANEE EAK  
KFRKAVTDLLGRRQRKSEKRRDPPNGPNLP  
MATVDIKNPEITTRFYGPQVNNISHTKEKKKG  
KAKKKRLTKADIGTPSNFQHIGHV GWPNTGFDLNNLDPEL

KNLFDLCGISEAQLKDRETSKVIYDFIEKTGGVEAVKNELRRQA  
PPPPPPSRGGPPPPPPPHSSGPPPPPARGRGAPP  
PPPSRAPTAAPPPPPSRPGVGVPPPPPNRMYPPPPPALPSSA  
PSGPPPPPLSLAGSAAPPPPPPPPPGPPPPG  
LPSDGDHQVPTPAGSKAALLDQIREGAQLKKVEQNSRPVSCSG  
RDALLDQIRQGIQLKSVSDGQESTPPTPAPTSIVGALMEVMQKR  
SKAIHSSDEDEDEDEDFEDDEWED

>XtSCAR2

MPLVARCIEPRFLCRQKLPPVRSELECMNTLSNVIRQLGSLSR  
YAEDIFGELFSEASMFHRVGLGERVERLQVKVTQLDPKEEVSLQGIN  
TRKAFRSNTSQDQQLFIRDLSLPVRETYSTCDMPPPLNILSPYREDE  
KEALKFYTDPSYFFDLWKEKMLQDTKDIIEKRKRHRREKKNPN  
RGNVNRKIRTRKEEWEKMKMGLEFVEAKDKMQNAGKF  
FLLIGCSRLLLLKGVCTFYTTTRYMF  
KHCFTKNNFKCFDSFSGQPSLHRSS  
LVSPAYPPPAPPIGSPIGSRPSFPPPAPPPPPPDG  
SVPDAPYLPPSPPPVFSLPG  
FPAPAPPPPPAPTHLDYPAASPHSPTQAPSGG  
PPPPPPPPPPGPPPPPAFHSHEGES  
PSQISKPKTSLPPVSDPRSDLLSAIRE  
GFQLRKVEEKMEHEKRDVGGNDVATILSRRIAVEYSDSEDDSSSEF  
DEDDWSD

>XtSCAR3

MPLVKRNIIEPRHLCRGTVPDGVTSELECVTNSTLAAIIKQLGSLSR  
HAEDIFGELFNEANSFYMRMNSLQERVDLLVIKVTQLDSTVEEVSLQDIN  
MRKAFKSSTVQNNQVSRNSIPNPVMEMYQRGDKPPPLNILTPYRDDK  
KDGLRFYTDPSYFFNLWKEKMLQATEDKRKEKRRQKEQRLVEDPT  
REVKKVRKARNRLEWNNMAYDKELRPDNRFSPPYHVASS  
EGSLSPDNRQVPHIMYLDHSPASPNHPG  
QQIMAPAALLTSENKDIILMATQAQEHGYRSSAPGSRQNS  
LNRAQQAHAHQPEAIPNGPRPQVMKDYGGQ  
QVPMTEYFVPPAPPPPPVIPSQTA  
FDSPISAPTPVAPNIAALSSYIPAPPAPPCPYSGSPPT  
GPVGGPVAPPPPPGPIITASPAHSAS  
PPTLTVEPRKPQIPIIPMSDARSDLLAAIRR  
GIQLRKVQEQRQEAKKEPVGNDVATILSRRIAVEYSEDDSEL  
EENEWS

>GM10494.f59-12.1

*gagcagagccggagccaggtgcaggccattggagagaaggtctccttggcccaggccaag  
attgagaagatcaagggcagcaagaagccatcaaggtgttctccagtgccaaagtaccct  
gctccagagcgcctgcaggaatatggctccatcttcaccggcgcccaggaccctggcctg  
cagagacgccccgccacaggatccagagcaagcaccgccccctggacgagcgggcccctg  
caggagaagctgaaggactttcctgtgtgctgagcaccaagccggagcccaggacgat*

gcagaagagggacttgggggtcttcccagcaacatcagctctgtcagctccttgctgctc  
ttcaaccaccgagaacctgtacaagaagtatgtcttcctggaccccctggctggtgct  
gtaacaaagaccatgtgatgctgggggagagacagaggagaagctgtttgatgcccc  
ttgtccatcagcaagagagagcagctggaacagcaggtcccagagaactacttctatgtg  
ccagacctgggaccaggtgcctgagattgatgttccatcctacctgcctgacctgtccggc  
attgccaatgacctcatgtacattgccgacctgggccccggcattgccccctctgccct  
ggcaccattccagaactgccaccttccacactgaggtagccgagcctctcaaggtagac  
ctacaagatggggtaactaaca-----ccacccccaccgccccaccaccacccccca  
gctcctgaggtgctggccagtgacccccactcccacctcaaccgaggccccctgtaggc  
caaggcgccaggcaggacgacagcagcagcagcgcgtctccttcagtccaggagctccc  
agggaaagtggctgaccccctccggtggctgggacctctctgctagagtccatccgccaagct  
gggggcatcggcaaggccaagctgcgagcatgaaggagcgaagggtggagaagaagaag  
cagaaggagcaggagcaagtgagagccacgagccaagggtgggaccttgatgtcggatctc  
ttcaacaagctggtcatgaggcgcaagggtatctctgggaaaagacctggggctggtgag  
gggccccggaggagcctttgcccggtgtgtcagactccatccctcctctgcccaccgag  
cagccacaggcagaggaggacgaggacgac

>GM10540.f.s9-12.1

gagcagagccggagccaggtgctggccattggagagaaggtctccttggcccaggccaag  
attgagaagatcaagggcagcaagaaggccatcaaggtgttctccagtccaagtaccct  
gctccagagcgcctgcaggaatatggctccatcttcaccggcgcccaggacctggcctg  
cagagacgccccgccacaggatccagagcaagcaccgccccctggacgagcgggacctg  
caggagaagctgaaggactttcctgtgtgctgagcaccaagccggagcccaggacgat  
gcagaagagggacttgggggtcttcccagcaacatcagctctgtcagctccttgctgctc  
ttcaaccaccgagaacctgtacaagaagtatgtcttcctggaccccctggctggtgct  
gtaacaaagaccatgtgatgctgggggagagacagaggagaagctgtttgatgcccc  
ttgtccatcagcaagagagagcagctggaacagcaggtcccagagaactacttctatgtg  
ccagacctgggaccaggtgcctgagattgatgttccatcctacctgcctgacctgtccggc  
attgccaatgacctcatgtacattgccgacctgggccccggcattgccccctctgccct  
ggcaccattccagaactgccaccttccacactgaggtagccgagcctctcaaggtagac  
ctacaagatggggtaactaaca-----ccacccccaccgccccaccaccacccccca  
gctcctgaggtgctggccagtgacccccactcccacctcaaccgaggccccctgtaggc  
caaggcgccaggcaggacgacagcagcaccagcgcgtctccttcagtccaggagctccc  
agggaaagtggctgaccccctccggtggctgggacctctctgctagagtccatccgccaagct  
gggggcatcggcaaggccaagctgcgagcatgaaggagcgaagggtggagaagaagaag  
cagaaggagcaggagcaagtgagagccacgagccaagggtgggaccttgatgtcggatctc  
ttcaacaagctggtcatgaggcgcaagggtatctctgggaaaagacctggggctggtgag  
gggccccggaggagcctttgcccggtgtgtcagactccatccctcctgtgcccaccgag  
cagccacaggcagaggaggacgaggacgac

>GM07791.f.s9-12.1

gagcagagccggagccaggtgagggcattggagagaaggtctccttggcccaggccaag  
attgagaagatcaagggcagcaagaaggccatcaaggtgttctccagtccaagtaccct  
gctccagagcgcctgcaggaatatggctccatcttcaccggcgcccaggacctggcctg  
cagagacgccccgccacaggatccagagcaagcaccgccccctggacgagcgggacctg  
caggagaagctgaaggactttcctgtgtgctgagcaccaagccggagcccaggacgat

gcagaagaggggcttgggggtcttcccagcaacatcagctctgtcagctccttgctgctc  
ttcaacaccaccgagaacctgtacaagaagtatgtcttcctggaccccctggctggtgct  
gtaacaaagaccatgtgatgctgggggagagacagaggagaagctgtttgatgcccc  
ttgtccatcagcaagagagagcagctggaacagcaggtcccagagaactacttctatgtg  
ccagacctgggaccaggtgcctgagattgatgttccatcttacctgcctgacctgtccggc  
attgccaatgacctcatgtgcattgccgacctgggccccggcattgccccctctgccct  
ggcaccattccagaactgccaccttccacactgaggtagccgagcctctcaaggtagac  
ctacaagatggggtaactaaca-----gcaccaccaccgccccaccaccacccccca  
gctcctgaggtgctggccagtgcatccccactcccaccctcaaccgcccctgtaggc  
caaggcgccaggcaggacgacagcagcagcagcgcgtctccttcagtccaggagctccc  
agggaaagtggctgaccccctccggtggctgggccaactctgctagagtccatccgccaagct  
gggggcatcggcaaggccaagctgcgagcatgaaggagcgaagggtggagaagaagaag  
cagaaggagcaggagcaagtgagagccacgagccaagggtggcacttgatgtcggatctc  
ttcaacaagctggtcatgaggcgcaagggtatctctgggaaaagacctggggctggtgag  
gggcccggaggagcctttgcccgctgtcagactccatccctcctctgcccaccgcag  
cagccacaggcagaggaggacgaggacgac

>GM10494.genomic.1

gagcagagccggagccaggtgcaggccattggagagaaggtctccttggcccaggccaag  
attgagaagatcaagggcagcaagaaggccatcaaggtgttctccagtccaagtaccct  
gctccagagcgcctgcaggaatatggctccatcttcaccggcgcccaggacctggcctg  
cagagacgctcccgccacaggatccagagcaagcaccgccccctggacgagcgggcccctg  
caggagaagctgaaggactttcctgtgtgctgagcaccaagccggagcccaggacgat  
gcagaagaggggacttgggggtcttcccagcaacatcagctctgtcagctccttgctgctc  
ttcaacaccaccgagaacctgtacaagaagtatgtcttcctggaccccctggctggtgct  
gtaacaaagaccatgtgatgctgggggagagacagaggagaagctgtttgatgcccc  
ttgtccatcagcaagagagagcagctggaacagcaggtcccagagaactacttctatgtg  
ccagacctgggaccaggtgcctgagattcatgttccatccttacctgcctgacctgcccggc  
attgccaatgacctcatgtacattgccgacctgggccccggcattgccccctctgccct  
ggcaccattccagaactgccaccttccacactgaggtagccgagcctctcaaggtagac  
ctacaagatggggtaactaaca-----ccacccccaccgccccaccaccacccccca  
gctcctgaggtgctggccagtgacccccactcccaccctcaaccgcccctgtaggc  
caaggcgccaggcaggacgacagcagcagcagcgcgtctccttcagtccaggagctccc  
agggaaagtggctgaccccctccggtggctgggccaactctgctagagtccatccgccaagct  
gggggcatcggcaaggccaagctgcgagcatgaaggagcgaagggtggagaagaagaag  
cagaaggagcaggagcaagtgagagccacgagccaagggtggcacttgatgtcggatctc  
ttcaacaagctggtcatgaggcgcaagggtatctctgggaaaagacctggggctggtgag  
gggcccggaggagcctttgcccgctgtcagactccatccctcctgtgcccaccgcag  
cagccacaggcagaggaggacgaggacgac

>GM10540.fs20.1\_and\_GM10540.genomic.2

gagcagagccggagccaggtgcaggccattggagagaaggtctccttggcccaggccaag  
attgagaagatcaagggcagcaagaaggccatcaaggtgttctccagtccaagtaccct  
gctccagagcgcctgcaggaatatggctccatcttcaccagcgcaccaggacctggcctg  
cagagacgccccgccacaggatccagagcaagcaccgccccctggacgagcgggcccctg  
caggagaagctgaaggactttcctgtgtgctgagcaccaagccggagcccaggacgat

gcagaagagggacttgggggtcttcccagcaacatcagctctgtcagctccttgctgctc  
ttcaacaccaccgagaacctgtacaagaagtatgtcttcctggaccccctggctggtgct  
gtaacaaagaccatgtgatgctgggggagagacagaggagaagctgtttgatgcccc  
ttgtccatcagcaagagagagcagctggaacagcaggtcccagagaactacttctatgtg  
ccagacctgggaccaggtgcctgagattgatgttccatcctacctgcctgacctgtctggc  
attgccaatgacctcatgtacattgccgacctgggccccggcattgccccctctgcccc  
ggcaccattccagaactgccaccttccacactgaggtagccgagcctctcaaggtagac  
ctacaagatggggtaactaaca-----ccacccccaccgccccaccaccacccccca  
gctcctgaggtgctggccagtgacccccactcccaccctcaaccgaggccccctgtaggc  
caaggcgccaggcaggacgacagcagcagcagcgcgtctccttcagtccaggagctccc  
agggaaagtggctgaccccctccggtggctgggccaactctgctagagtccatccgccaagct  
gggggcatcagcaaggccaagccgagcagcagcagcgcgtctccttcagtccaggagctccc  
cagaaggagcaggagcaagtgagagccacgagccaaggtgggcaacttgatgtcggatctc  
ttcaacaagctggtcatgaggcgcaaggcatctctgggaaaggacctggggctggtgag  
gggccccggaggagcctttgcccgctgtcagactccatccctcctctgcccaccgag  
cagccacaggcagaggaggacgaggacgac

>GM10540.genomic.1

gagcagagccggagccaggtgcaggccattggagagaaggtctccttggcccaggccaag  
attgagaagatcaagggcagcaagaaggccatcaaggtgttctccagtccaagtaccct  
gctccagagcgcctgcaggaatatggctccatcttcaccagcgcaccaggacctggcctg  
cagagacgccccgccacaggatccagagcaagcaccgccccctggacgagcgggccccg  
caggagaagctgaagtacttctctgtgtgctgagcaccaagccggagcccaggagcagat  
gcagaagagggacttgggggtcttcccagcaacatcagctctgtcagctccttgctgctc  
ttcaacaccaccgagaacctgtacaagaagtatgtcttcctggaccccctggctggtgct  
gtaacaaagaccatgtgatgctgggggagagacagaggagaagctgtttgatgcccc  
ttgtccatcagcaagagagagcagctggaacagcaggtcccagagaactacttctatgtg  
ccagacctgggaccaggtgcctgagattgatgttccatcctacctgcctgacctgtctggc  
attgccaatgacctcatgtacattgccgacctgggccccggcattgccccctctgcccc  
ggcaccattccagaactgccaccttccacactgaggtagccgagcctctcaaggtagac  
ctacaagatggggtaactaaca-----ccacccccaccgccccaccaccacccccca  
gctcctgaggtgctggccagtgacccccactcccaccctcaaccgaggccccctgtaggc  
caaggcgccaggcaggacgacagcagcagcagcgcgtctccttcagtccaggagctccc  
agggaaagtggctgaccccctccggtggctgggccaactctgctagagtccatccgccaagct  
gggggcatcagcaaggccaagccgagcagcagcagcgcgtctccttcagtccaggagctccc  
cagaaggagcaggagcaagtgagagccacgagccaaggtgggcaacttgatgtcggatctc  
ttcaacaagctggtcatgaggcgcaaggcatctctgggaaaggacctggggctggtgag  
gggccccggaggagcctttgcccgctgtcagactccatccctcctctgcccaccgag  
cagccacaggcagaggaggacgaggacgac

>chr9 assembly

gagcagagccggagccaggtgcaggccattggagagaaggtctccttggcccaggccaag  
attgagaagatcaagggcagcaagaaggccatcaaggtgttctccagtccaagtaccct  
gctccagggcgcctgcaggaatatggctccatcttcacgggccccaggacctggcctg  
cagagacgccccgccacaggatccagagcaagcaccgccccctggacgagcgggccccg  
caggagaagctgaaggacttctctgtgtgctgagcaccaagccggagcccaggagcagat

gcagaagagggacttgggggtcttcccagcaacatcagctctgtcagctccttgctgctc  
ttcaacaccaccgagaacctgtacaagaagtatgtcttcctggaccccctggctggtgct  
gtaacaaagaccatgtgatgctgggggagagacagaggagaagctgtttgatgcccc  
ttgtccatcagcaagagagagcagctggaacagcaggtcccagagaactacttctatgtg  
ccagacctgggaccaggtgcctgagatccatgttccatcctacctgcctgacctgccccggc  
attgccaacgacctcatgtacagtgccgacctgggccccggcattgccccctctgcccc  
ggcaccattccagaactgccaccttccacactgaggtagccgagcctctcaaggtagac  
ctacaagatggggtaactaaca-----ccacccccaccgccccaccaccacccccca  
gctcctgaggtgctggccagtgacccccactcccaccctcaaccgaggccccctgtaggc  
caaggcgccaggcaggacgacagcagcagcagcgcacatctccttcagtccaggagctccc  
agggaaagtggctgaccccctccggtggctgggccaactctgctagagtccatccgccaagct  
gggggcatcggcaaggccaagctgcgagcatgaaggagcgaagctggagaagcagcag  
cagaaggagcaggagcaagtgagagccacgagccaaggtgggcaacttgatgtcggatctc  
ttcaacaagctggtcatgaggcgcaaggcatctctgggaaaggacctggggctggtgag  
gggcccggaggagcctttgtccgctgtcagactccatccctcctttgcccaccgag  
cagccacaggcagaggaggacgaggacgac

>GM10494.genomic.3

gagcagagccggagccaggtgcaggccattggagagaaggtctccttggcccaggccaag  
attgagaagatcaagggcagcaagaaggccatcaaggtgttctccagtccaagtaccct  
gctccagagcgcctgcaggaatatggctccatcttcaccgAcgcccaggacctggcctg  
cagagacgccccgccacaggatccagagcaagcaccgccccctggacgagcgggccccg  
caggagaagctgaaggacttctcctgtgtgctgagcaccaagccggagcccaggagcagat  
gcagaagagggacttgggggtcttcccagcaacatcagctctgtcagctccttgctgctc  
ttcaacaccaccgagaacctgtacaagaagtatgtcttcctggaccccctggctggtgct  
gtaacaaagaccatgtgatgctgggggagagacagaggagaagctgtttgatgcccc  
ttgtccatcagcaagagagagcagctggaacagcaggtcccagagaactacttctatgtg  
ccagacctgggaccaggtgcctgagattgatgttccatcctacctgcctgacctgccccggc  
attgccaacgacctcatgtacattgccgacctgggccccggcattgccccctctgcccc  
ggcaccattccagaactgccaccttccacactgaggtagccgagcctctcaaggtagac  
ctacaagatggggtaactaaca-----ccacccccaccgccccaccaccacccccca  
gctcctgaggtgctggccagtgacccccactcccaccctcaaccgaggccccctgtaggc  
caaggcgccaggcaggacgacagcagcagcagcgcacatctccttcagtccaggagctccc  
agggaaagtggctgaccccctccggtggccgggccaactctgctagagtccatccgccaagct  
gggggcatcggcaaggccaagctgcgagcatgaaggagcgaaggtggagaagcagcag  
cagaaggagcaggagcaagtgagagccacgagccaaggtgggcaacttgatgtcggatctc  
ttcaacaagctggtcatgaggcgcaaggcatctctgggaaaggacctggggctggtgag  
gggcccggaggagcctttgcccgcgtgtcagactccatccctcctctgcccaccgag  
cagccacaggcagaggaggacgaggacgac

>GM10494.genomic.2

gagcagagccggagccaggtgcaggccattggagagaaggtctccttggcccaggccaag  
attgagaagatcaagggcagcaagaaggccatcaaggtgttctccagtccaagtaccct  
gctccagagcgcctgcaggaatatggctccatcttcacgggccccaggacctggcctg  
cagagacgccccgccacaggatccagagcaagcaccgccccctggacgagcgggccccg  
caggagaagctgaaggacttctcctgtgtgctgagcaccaagccggagcccaggagcagat

gcagaagagggacttgggggtcttcccagcaacatcagctctgtcagctccttgctgctc  
ttcaacaccaccgagaacctgtacaagaagtatgtcttcctggaccccctggctggtgct  
gtaacaaagaccatgtgatgctgggggcagagacagaggagaagctgtttgatgcccc  
ttgtccatcagcaagagagagcagctggaacagcaggtcccagagaactacttctatgtg  
ccagacctgggaccaggtgcctgagattcatgttccatcctacctgcctgacctgccccggc  
attgccaacgacctcatgtacattgccgacctgggccccggcattgccccctctgcccc  
ggcaccattccagaactgccaccttccacactgaggtagccgagcctctcaaggtagac  
ctacaagatggggtaactaaca-----ccacccccaccgccccaccaccacccccca  
gctcctgaggtgctggccagtgacccccactcccaccctcaaccgaggccccctgtaggc  
caaggcgccaggcaggacgacagcagcagcagcgcgtctccttcagtccaggagctccc  
agggaaagtggttgacccctccggtggctgggccaactctgctagagtccatccgccaagct  
gggggcatcggcaaggccaagctgcgagcatgaaggagcgaagctggagaagaagaag  
cagaaggagcaggagcaagtgagagccacgagccaagggtggcacttgatgtcggatctc  
ttcaacaagctggtcatgaggcgcaagggtctctgggaaaggacctggggctggtgag  
gggccccggaggagcctttgcccgctgtcagactccatccctcctgtgccgcccaccgag  
cagccacaggcagaggaggacgaggacgac

>hyb\_panel\_chr20\_B

gagcagagccggagccaggtgcaggccattggagagaaggtctccttggcccaggccaag  
attgagaagatcaagggcagcaagaaggccatcaagggttctccagtccaagtaccct  
gctccagagcgcctgcaggaatatggctccatcttcacgggcgcccaggacctggcctg  
cagagacgctcccgccacaggatccagagcaagcaccgccccctggacgagcgggccccg  
caggagaagctgaaggactttcccgtgtgctgagcaccaagccggagcccaggacgat  
gcagaagagggacttgggggtcttcccagcaacatcagctctgtcagctccttgctgctc  
ttcaacaccaccgagaacctgtacaagaagtatgtcttcctggaccccctggctggtgct  
gtaacaaagaccatgtgatgctgggggcagagacagaggagaagctgtttgatgcccc  
ttgtccatcagcaagagagagcagctggaacagcaggtcccagagaactacttctatgtg  
ccagacctgggaccaggtgcctgagattgatgttccatcctacctgcctgacctgccccggc  
attgccaacgacctcatgtacattgccgacctgggccccggcattgccccctctgcccc  
ggcaccattccagaactgccaccttccacactgaggtagccgagcctctcaaggcagac  
ctacaagatggggtaactaaca-----ccacccccaccgccccaccaccacccccca  
gctcctgaggtgctggccagtgacccccactcccaccctcaaccgaggccccctgtaggc  
caaggcgccaggcaggacgacagcagcagcagcgcgtctccttcagtccaggagctccc  
agggaaagtggctgacccctccggtggccgggccaactctgctagagtccatccgccaagct  
gggggcatcggcaaggccaagctgcgagcatgaaggagcgaagctggagaagaagaag  
cagaaggagcaggagcaagtgagagccacgagccaagggtggcacttgatgtcggatctc  
ttcaacaagctggtcatgaggcgcaagggtctctgggaaaggacctggggctggtgag  
gggccccggaggagcctttgcccgctgtcagactccatccctcctctgccgcccaccgag  
cagccacaggcagaggaggacgaggacgac

>GM10494.fs20.1

gagcagacccggagccaggtgcaggccattggagagaaggtctccttggcccaggccaag  
attgagaagatcaagggcggaagaaggccatcaagggttctccagtccaagtaccct  
gctccagagcgcctgcaggaatatggctccatcttcacgggcgcccaggacctggcctg  
cagagacgctcccgccacaggatccagagcaagcaccgccccctggacgagcgggccccg  
caggagaagctgaagtacttctcctgtgtgtgtgagcaccaagccggagcccaggacgat



gcagaagagggacttgggggtcttcccagcaacatcagctctgtcagctccttgctgctc  
ttcaacaccaccgagaacctgtacaagaagtatgtcttcctggaccccctggctggtgct  
gtaacaaagaccatgtgatgctgggggcagagacagaggagaagctgtttgatgcccc  
ttgtccatcagcaagagagagcagctggaacagcaggtcccagagaactacttctatgtg  
ccagacctgggaccaggtgcctgagattgatgttccgtcctacctgcctgacctgccccggc  
attgccaacgacctcatgtacagtgccgacctgggccccggcattgccccctctgcccc  
ggcaccattccggaactgccaccttccacactgaggtagccgagcctctcaaggcagac  
ctacaagatggggtaactaacagcaccaccaccacccccaccgccccaccacctccccca  
gctcctgaggtgctggccagtgcatccccactcccacctcaaccgaggccccctgtaggc  
caaggcgccaggcaggacgacggcagcagcagcgcgtctccttcagtccaggagctccc  
agggaaagtggctgaccccctccggtggccgggacctctgctagagtccatccgccaagct  
gggggcatcggcaaggccaagctgcgacgctgaaggagcgaagctggagaagaagaag  
cagaaggagcaggagcaagtgagagccacgagccaaggtggggacttgatgtcggatctc  
ttcaacaagctggtcatgaggcgcaagggcatctctgggaaaggacctggggctggtgag  
gggccccggaggagcctttgcccgctgtcagactccatccctcctctgcccaccgcag  
cagccacaggcagaggaggacgaggacgac

>GM07791.fs20.1

gagcagagccggagccaggtgcaggccattggagagaaggtctccttggcccaggccaag  
attgagaagatcaagggcagcaagaaggccatcaaggtgttctccagtccaagtacct  
gctccagagcgcctgcaggaatatggctccatcttcacgggcgcccaggacctggcctg  
cagagacgctcccgccacaggatccagagcaagcaccgccccctggacgagcgggccccg  
caggagaagctgaagtacttctctgtgtgtgtgagaccaagccggagcccaggacgat  
gcagaagagggacttgggggtcttcccagcaacatcagctctgtcagctccttgctgctc  
ttcaacaccaccgagaacctgtacaagaagtatgtcttcctggaccccctggctggtgct  
gtaacaaagaccatgtgatgctgggggcagagacagaggagaagctgtttgatgcccc  
ttgtccatcagcaagagagagcagctggaacagcaggtcccagagaactacttctatgtg  
ccagacctgggaccaggtgcctgagattgatgttccgtcctacctgcctgacctgccccggc  
attgccaacgacctcatgtacagtgccgacctgggccccggcattgccccctctgcccc  
ggcaccattccggaactgccaccttccacactgaggtagccgagcctctcaaggcagac  
ctacaagatggggtaactaacagcaccaccaccacccccaccgccccaccacctccccca  
gctcctgaggtgctggccagtgcatccccactcccacctcaaccgaggccccctgtaggc  
caaggcgccaggcaggacgacggcagcagcagcgcgtctccttcagtccaggagctccc  
agggaaagtggctgaccccctccggtggccgggacctctctgctagagtccatccgccaagct  
gggggcatcggcaaggccaagctgcgacgctgaaggagcgaagctggagaagaagaag  
cagaaggagcaggagcaagtgagagccacgagccaaggtggggacttgatgtcggatctc  
ttcaacaagctggtcatgaggcgcaagggcatctctgggaaaggacctggggctggtgag  
gggccccggaggagcctttgcccgctgtcagactccatccctcctctgcccaccgcag  
cagccacaggcagaggaggacgaggacgac

>BC048328

gagcagagccggagccaggtgcaggccattggagagaaggtctccttggcccaggccaag  
attgagaagatcaagggcagcaagaaggccatcaaggtgttctccagtccaagtacct  
gctccagagcgcctgcaggaatatggctccatcttcacgggcgcccaggacctggcctg  
cagagacgctcccgccacaggatccagagcaagcaccgccccctggacgagcgggccccg  
caggagaagctgaagtacttctctgtgtgtgtgagaccaagccggagcccaggacgat

gcagaagagggacttgggggtcttcccagcaacatcagctctgtcagctccttgctgctc  
ttcaacaccaccgagaacctgtacaagaagtatgtcttcctggaccccctggctggtgct  
gtaacaaagacccatgtgatgctgggggcagagacagaggagaagctgtttgatgcccc  
ttgtccatcagcaagagagagcagctggaacagcaggtcccagagaactacttctatgtg  
ccagacctgggcccaggtgcctgagattgatgttccgtcctacctgcctgacctgcccggc  
attgccaacgacctcatgtacagtgccgacctgggccccggcattgccccctctgcccc  
ggcaccattccggaactgccaccttccacactgaggtagccgagcctctcaaggcagac  
ctacaagatggggtaactaacagcaccaccaccacccccaccgccccaccacctcccca  
gctcctgaggtgctggccagtgcatccccactcccacctcaaccgcccctgtaggc  
caaggcgcaggcaggacgacagcagcagcagcgcgtctccttcagtccaggagctccc  
agggaaagtggctcgaaccctccggtggccgggccaactctgctagagtccatccgccaagct  
gggggcatcggcaaggccaagctgcgagcgtgaaggagcgaagctggagaagaagaag  
cagaaggagcaggagcaagtgagagccagcagccaaggctggggacttgatgtcggatctc  
ttcaacaagctggtcatgaggcgcaaggcatctctgggaaaggacctggggctggtgag  
gggcccggaggagcctttgcccgctgtcagactccatccctcctctgcccaccgcag  
cagccacaggcagaggaggacgaggacgac
