# Supplementary material
Source: PubMed Central journal article supplement (PMC2323319)
Supplement: pgen.0030237.sg001.pdf [file pgen.0030237.sg001.pdf]

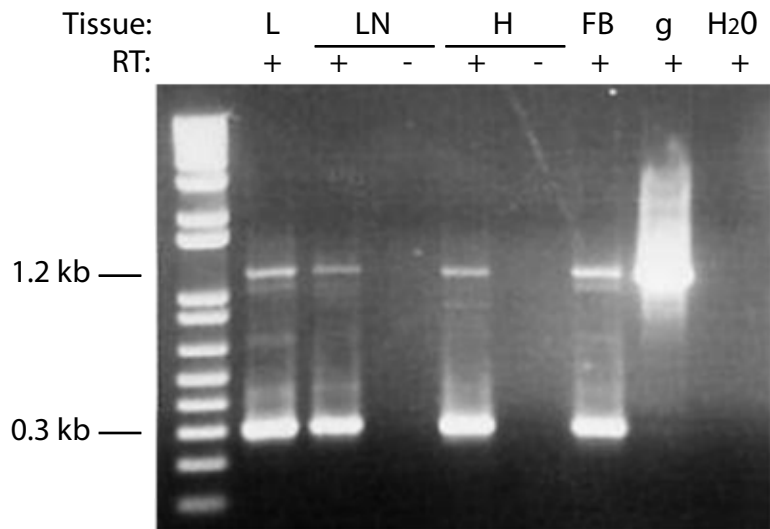

Supplementary Figure S1. RT-PCR confirmation of human WASH expression using exon 8 and exon 10 primers. L, liver; LN, lymph node; H, heart; FB, fetal brain; g, genomic DNA. Reverse-transcriptase (RT)-negative controls were also performed for some tissues. The 0.3-kb band is the expected size for fully spliced WASH transcript.
