# Supplementary material
Source: PubMed Central journal article supplement (PMC2323319)
Supplement: pgen.0030237.sg002.pdf [file pgen.0030237.sg002.pdf]

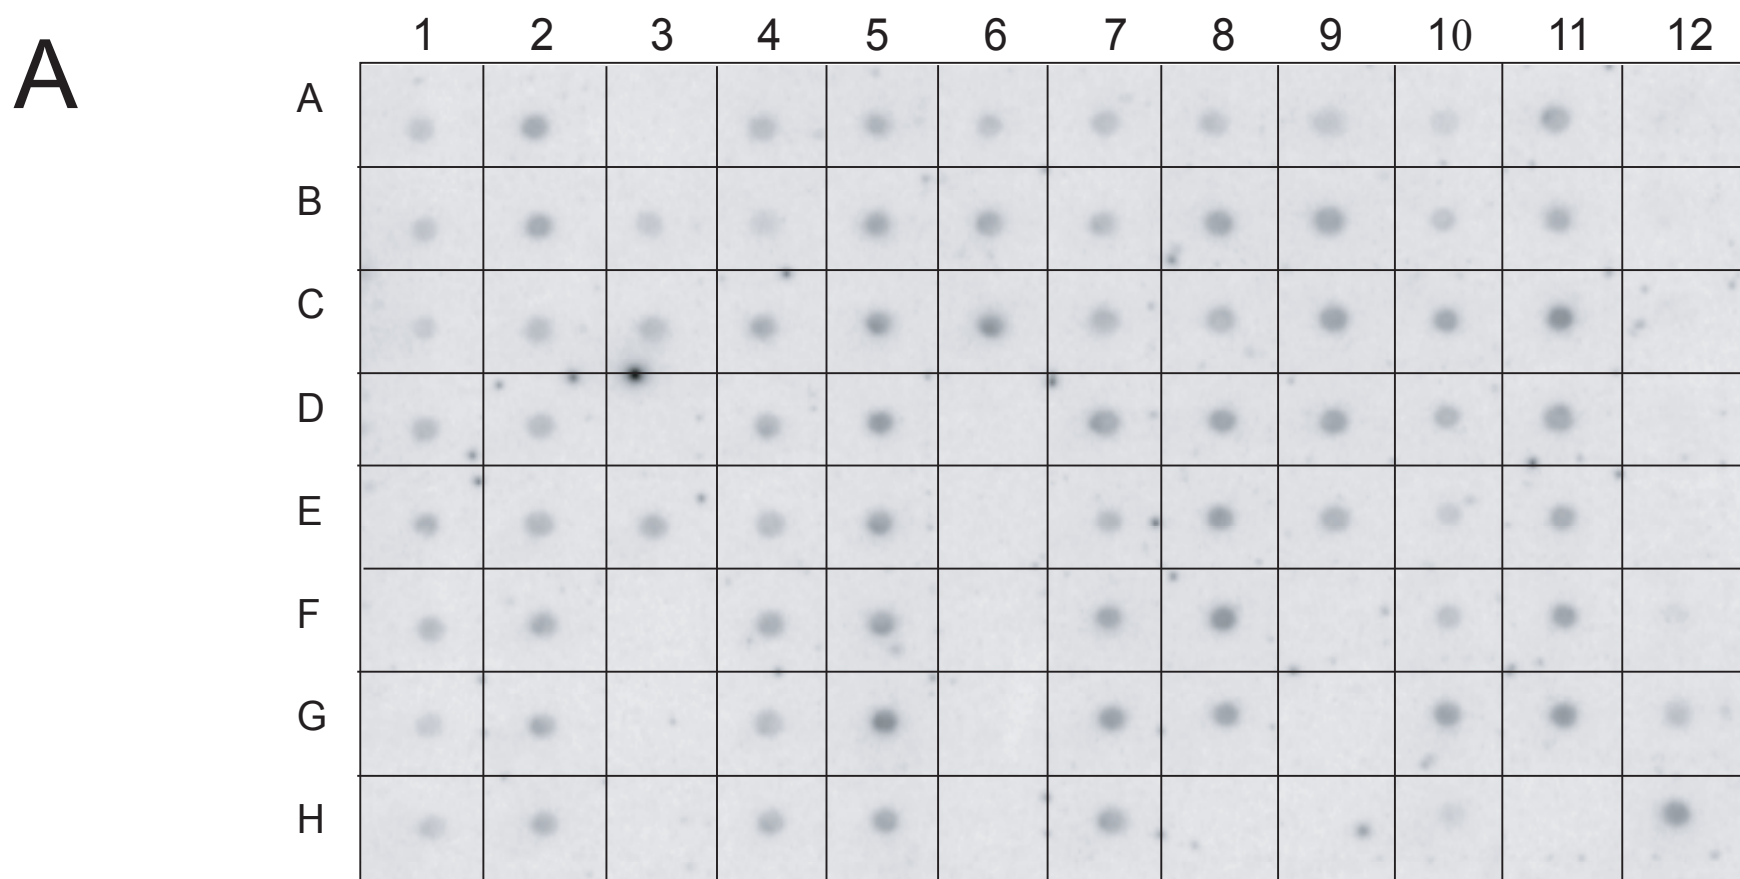

**B**

|   |                          |                   |                    |                          |                  |                  |                            |          |                |                                 |              |                  |
|---|--------------------------|-------------------|--------------------|--------------------------|------------------|------------------|----------------------------|----------|----------------|---------------------------------|--------------|------------------|
|   | 1                        | 2                 | 3                  | 4                        | 5                | 6                | 7                          | 8        | 9              | 10                              | 11           | 12               |
| A | whole brain              | cerebellum left   |                    | heart                    | esophagus        | colon transverse | kidney                     | lung     | liver          | leukemia HL60                   | fetal brain  | yeast total RNA  |
| B | cerebral cortex          | cerebellum right  | accum-bens nucleus | aorta                    | stomach          | colon descending | skeletal muscle            | placenta | pancreas       | HeLa S3                         | fetal heart  | yeast tRNA       |
| C | frontal lobe             | corpus callosum   | thalamus           | atrium left              | duodenum         | rectum           | spleen                     | bladder  | adrenal gland  | leukemia K562                   | fetal kidney | E. coli rRNA     |
| D | parietal lobe            | amygdala          |                    | atrium right             | jejunum          |                  | thymus                     | uterus   | thyroid gland  | leukemia MOLT4                  | fetal liver  | E. coli DNA      |
| E | occipital lobe           | caudate nucleus   | spinal cord        | ventricle left           | ileum            |                  | peripheral blood leukocyte | prostate | salivary gland | Burkitt's lymphoma Raji         | fetal spleen | poly r(A)        |
| F | temporal lobe            | hippocampus       |                    | ventricle right          | ileocecum        |                  | lymph node                 | testis   |                | Burkitt's lymphoma Daudi        | fetal thymus | human Cot1 DNA   |
| G | p.g.* of cerebral cortex | medulla oblongata |                    | inter-ventricular septum | appendix         |                  | bone marrow                | ovary    |                | colorectal adenocarcinoma SW480 | fetal lung   | human DNA 100 ng |
| H | pons                     | putamen           |                    | apex of the heart        | colon descending |                  | trachea                    |          |                | lung carcinoma A549             |              | human DNA 500 ng |

\* paracentral gyrus

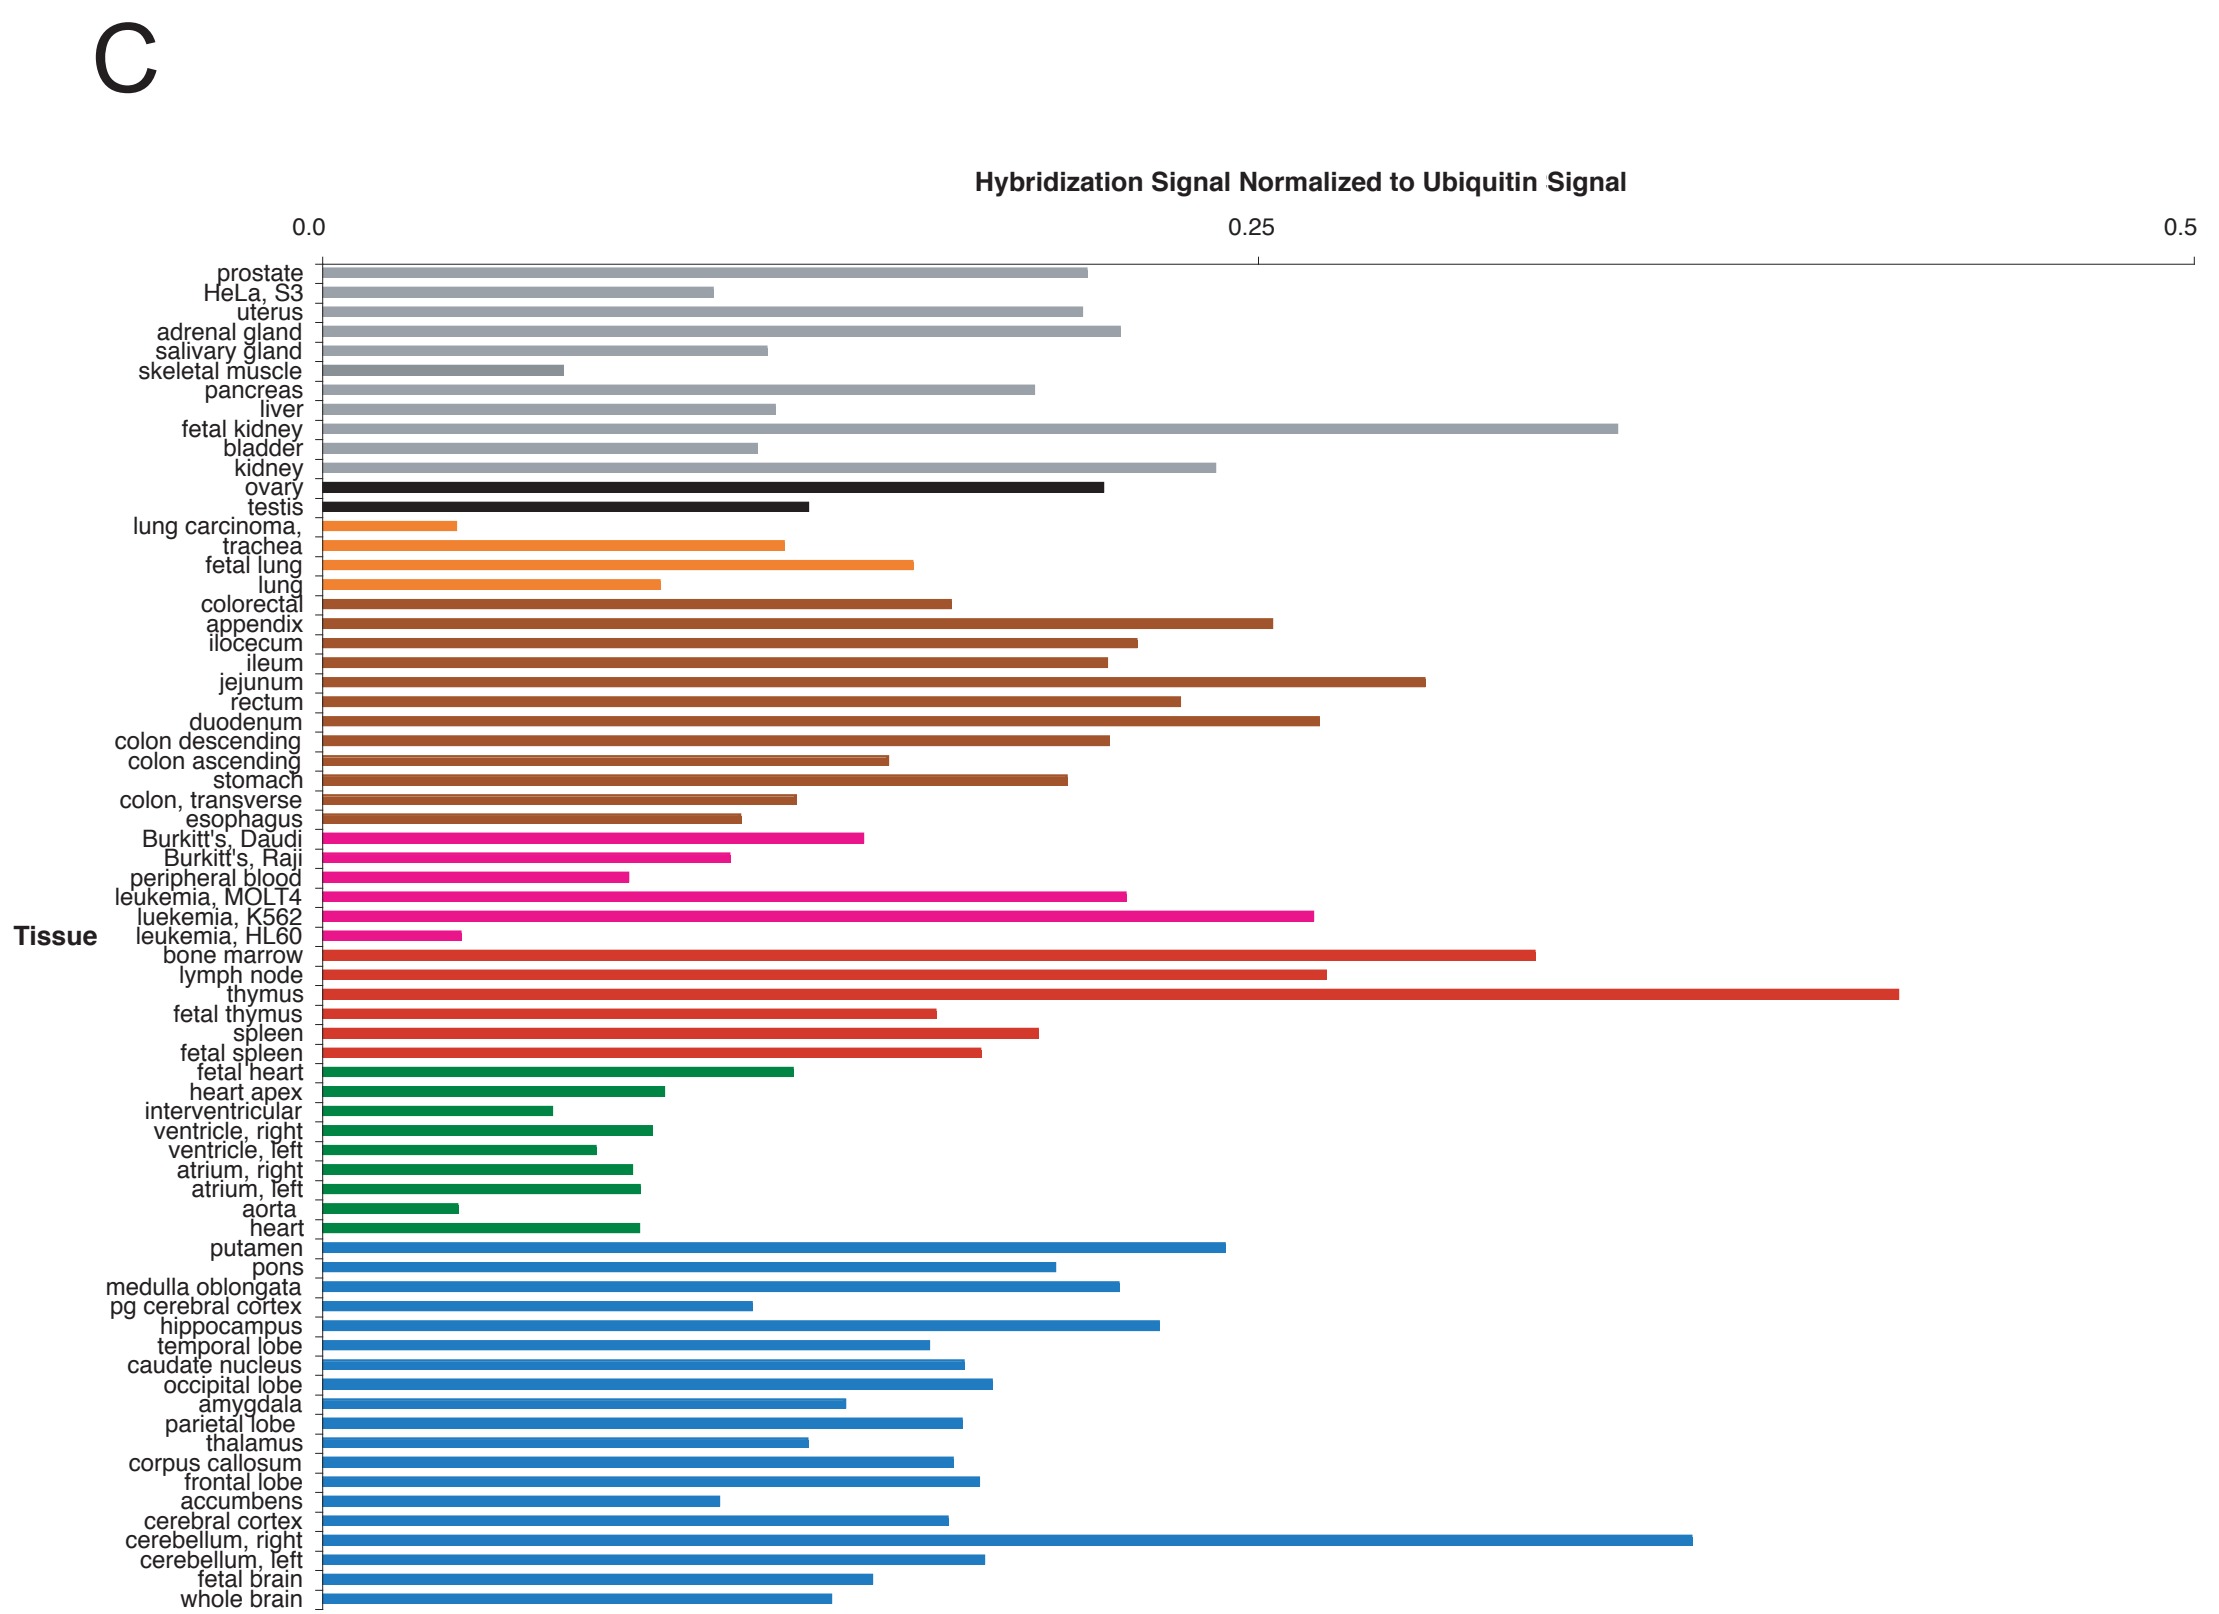

Supplementary Figure S2. Multiple tissue expression array autoradiograph after hybridization using WASH probe (A), the corresponding key to tissues (B), and C) relative WASH hybridization signals normalized to the ubiquitin signal, organized by tissue type.
