# Supplementary material
Source: PubMed Central journal article supplement (PMC2323319)
Supplement: pgen.0030237.sg006.pdf [file pgen.0030237.sg006.pdf]

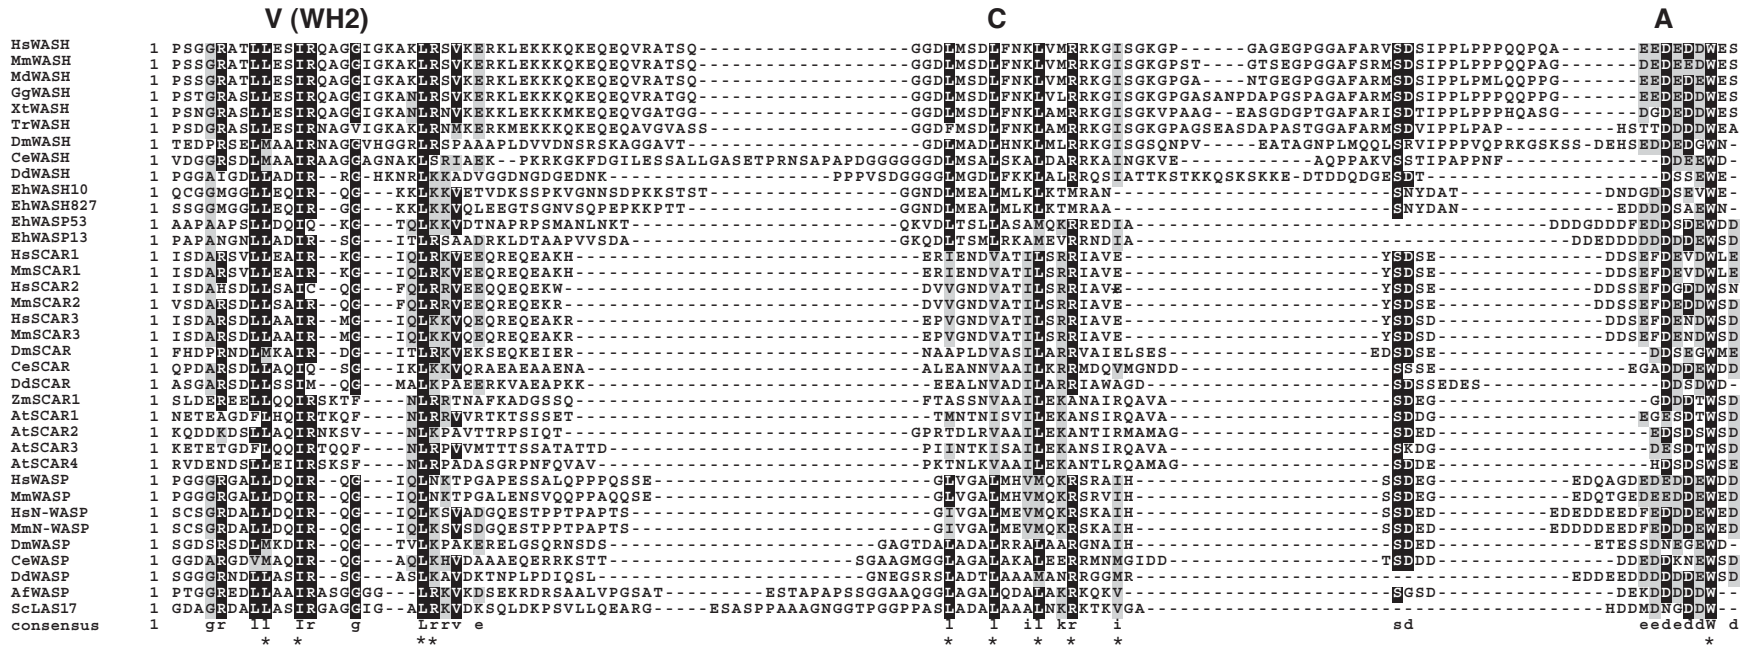

Supplementary Figure S6. Multiple sequence alignment of the VCA region in the C-terminal portion of WASP family members. See Supplementary Figure S4 for details. Species are indicated using two-letter abbreviation before each protein name; the code is provided in Supplementary Information (note: Mm is *Mus musculus*, not *Macaca mulatta*).
