# Supplementary material
Source: PubMed Central journal article supplement (PMC2323319)
Supplement: pgen.0030237.sg007.pdf [file pgen.0030237.sg007.pdf]

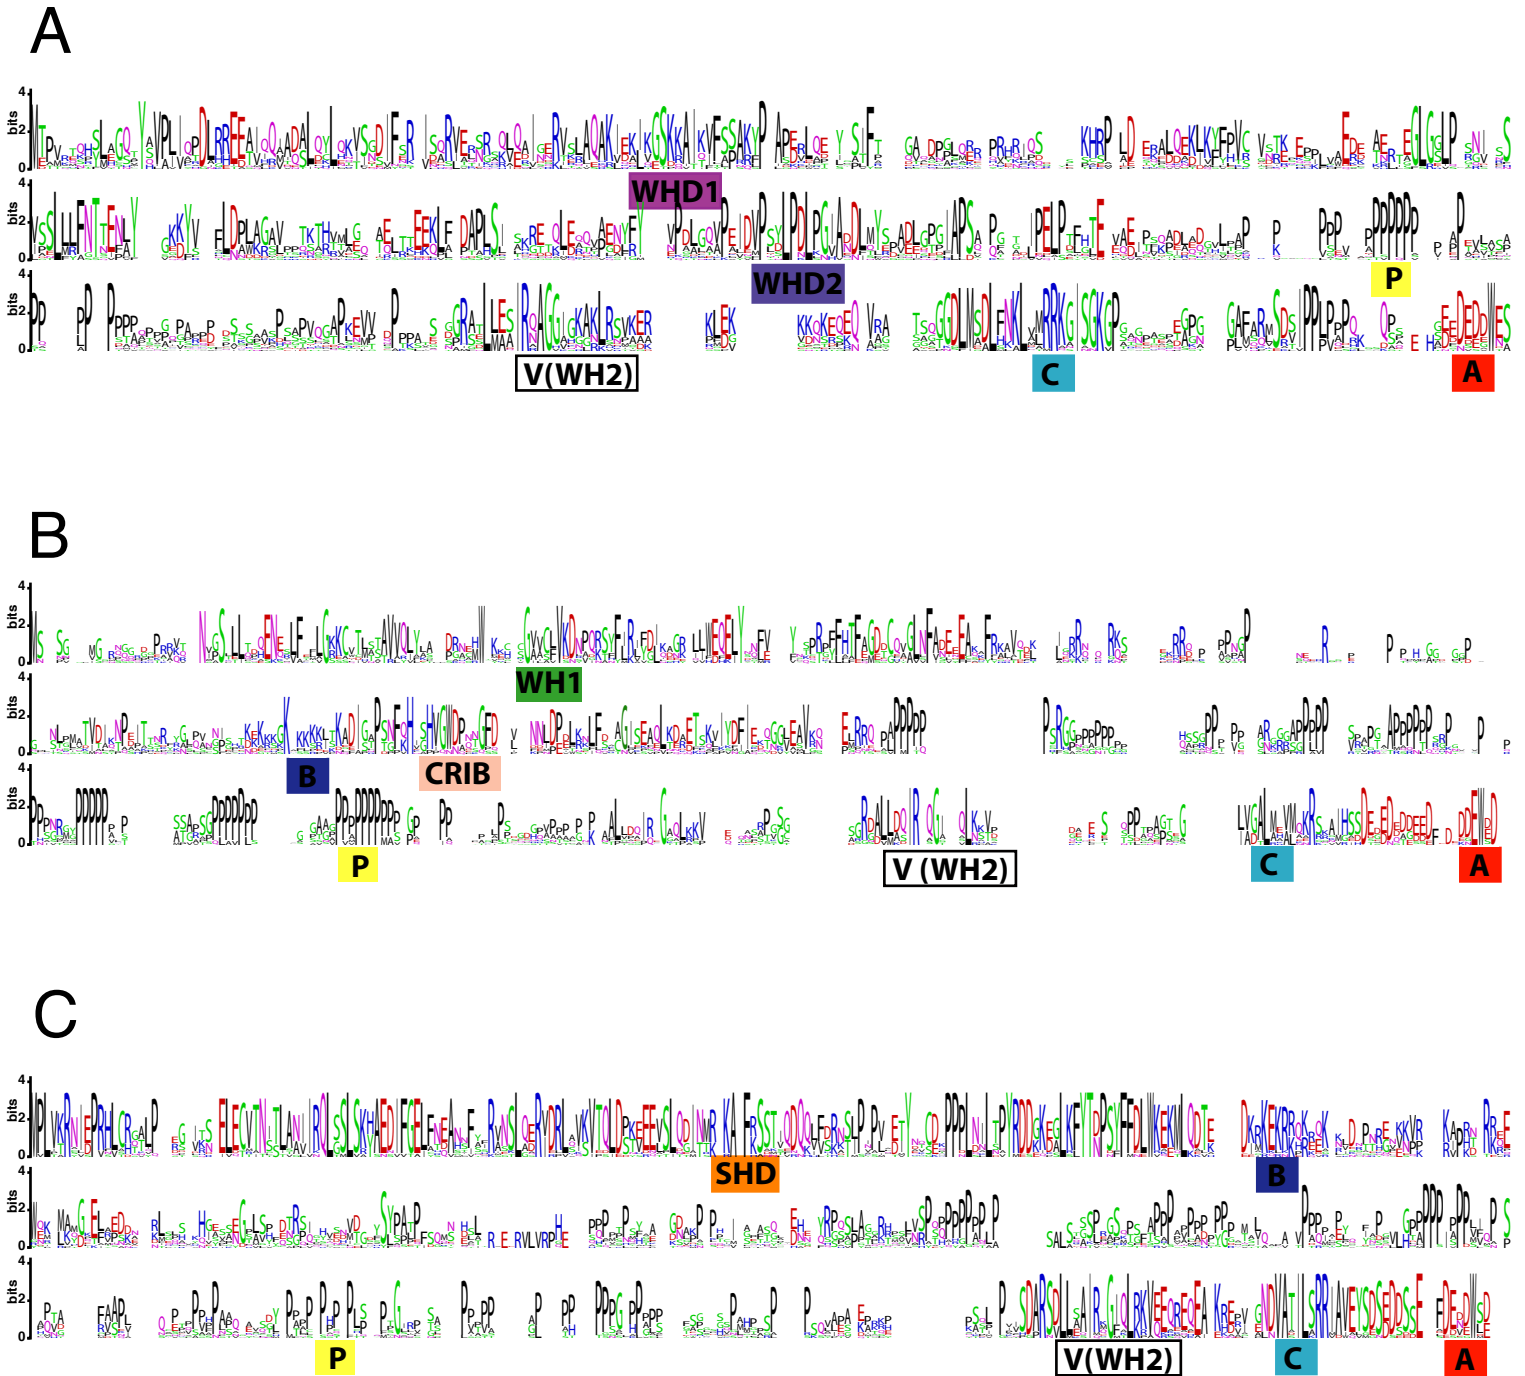

Supplementary Figure S7. Logo plots of (A) WASH, (B) WASP/N-WASP, and (C) SCAR/WAVE subclasses of the WASP family to illustrate protein conservation across species and differences among these subclasses in their N-terminal portions. The logo plots are based on alignments provided in Supplementary Figures S4, S8, and S9, respectively. Conserved domains are named above the alignment, using the same colors as used in Figure 3A; the domains extend beyond the labels. Heights of letters indicate degree of conservation in maximum entropy expressed in bits. Similar amino acids are given the same color; KRH, green; DE, blue; and AVLIPWFM, red. Gaps in the logo plots are regions with residues in only the minority of sequences.
