# Supplementary material
Source: PubMed Central journal article supplement (PMC2323319)
Supplement: pgen.0030237.sg008.pdf [file pgen.0030237.sg008.pdf]

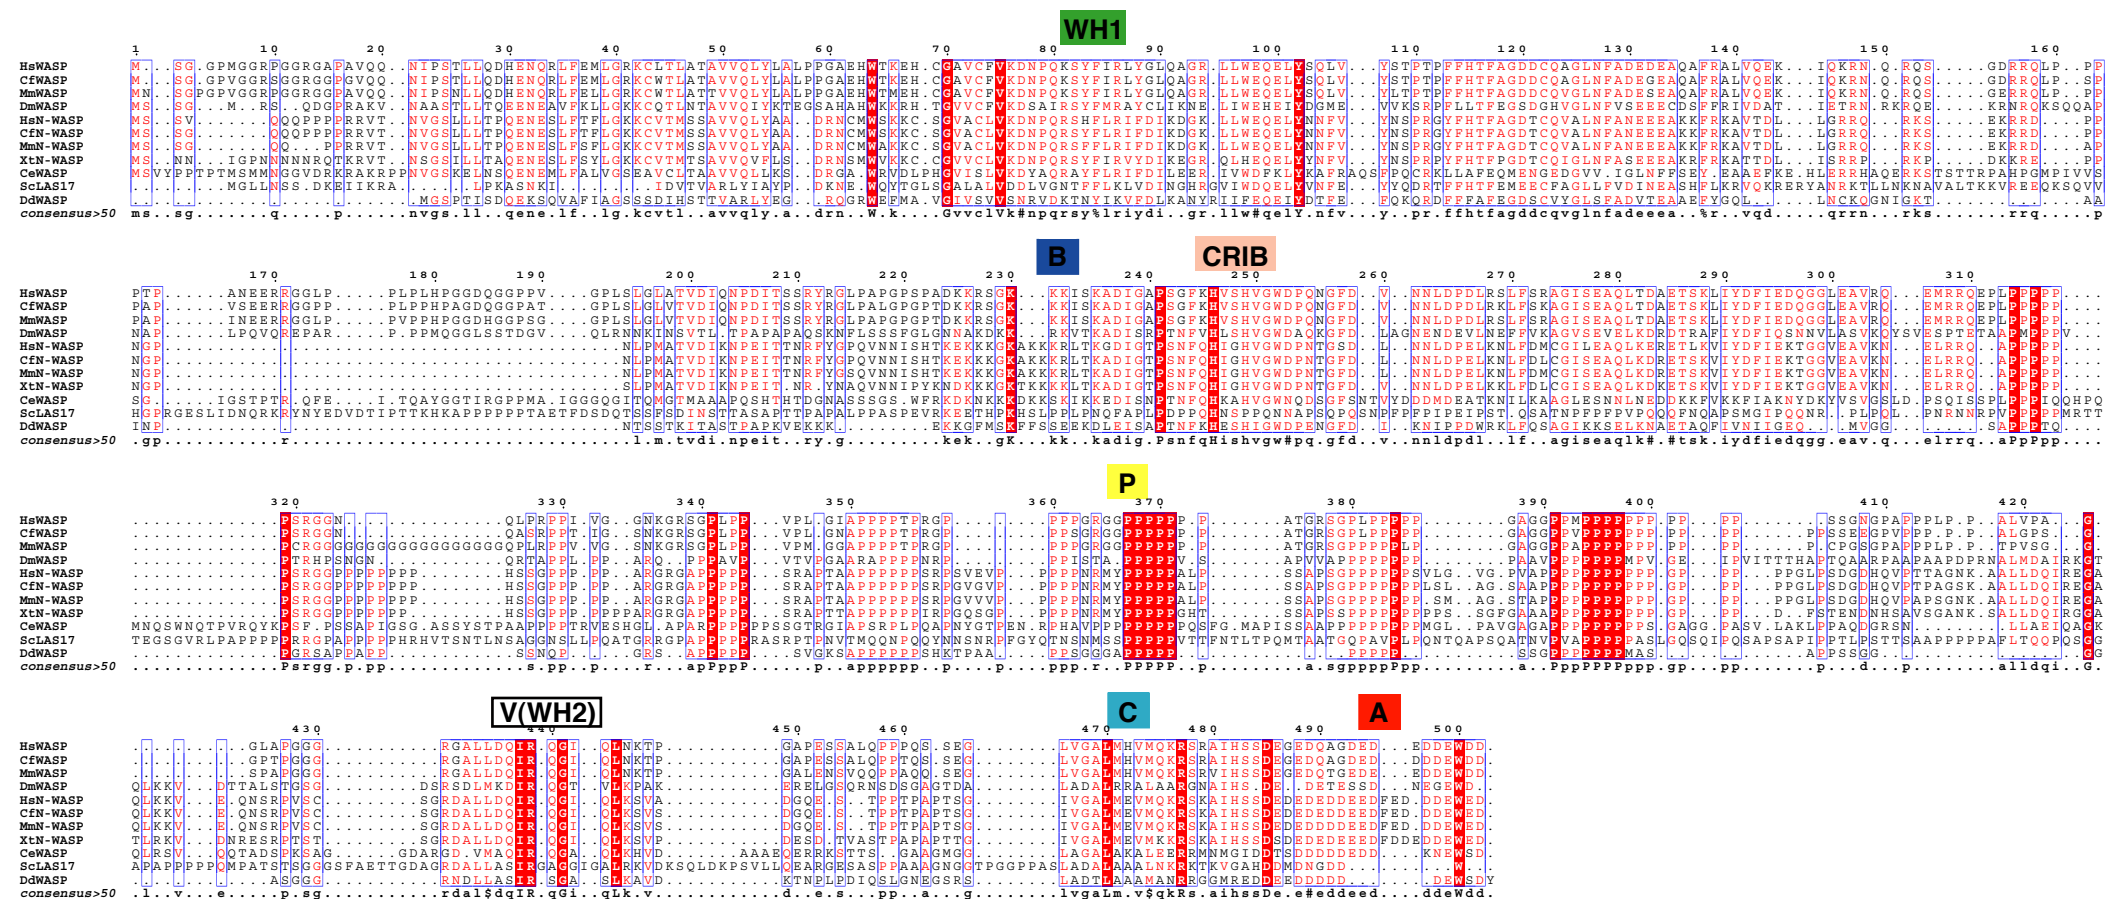

Supplementary Figure S8. Multiple alignment of WASP and N-WASP orthologs from diverse species. See Supplementary Figure S4 legend for details.
