# Supplementary material
Source: PubMed Central journal article supplement (PMC2323319)
Supplement: pgen.0030237.sg009.pdf [file pgen.0030237.sg009.pdf]

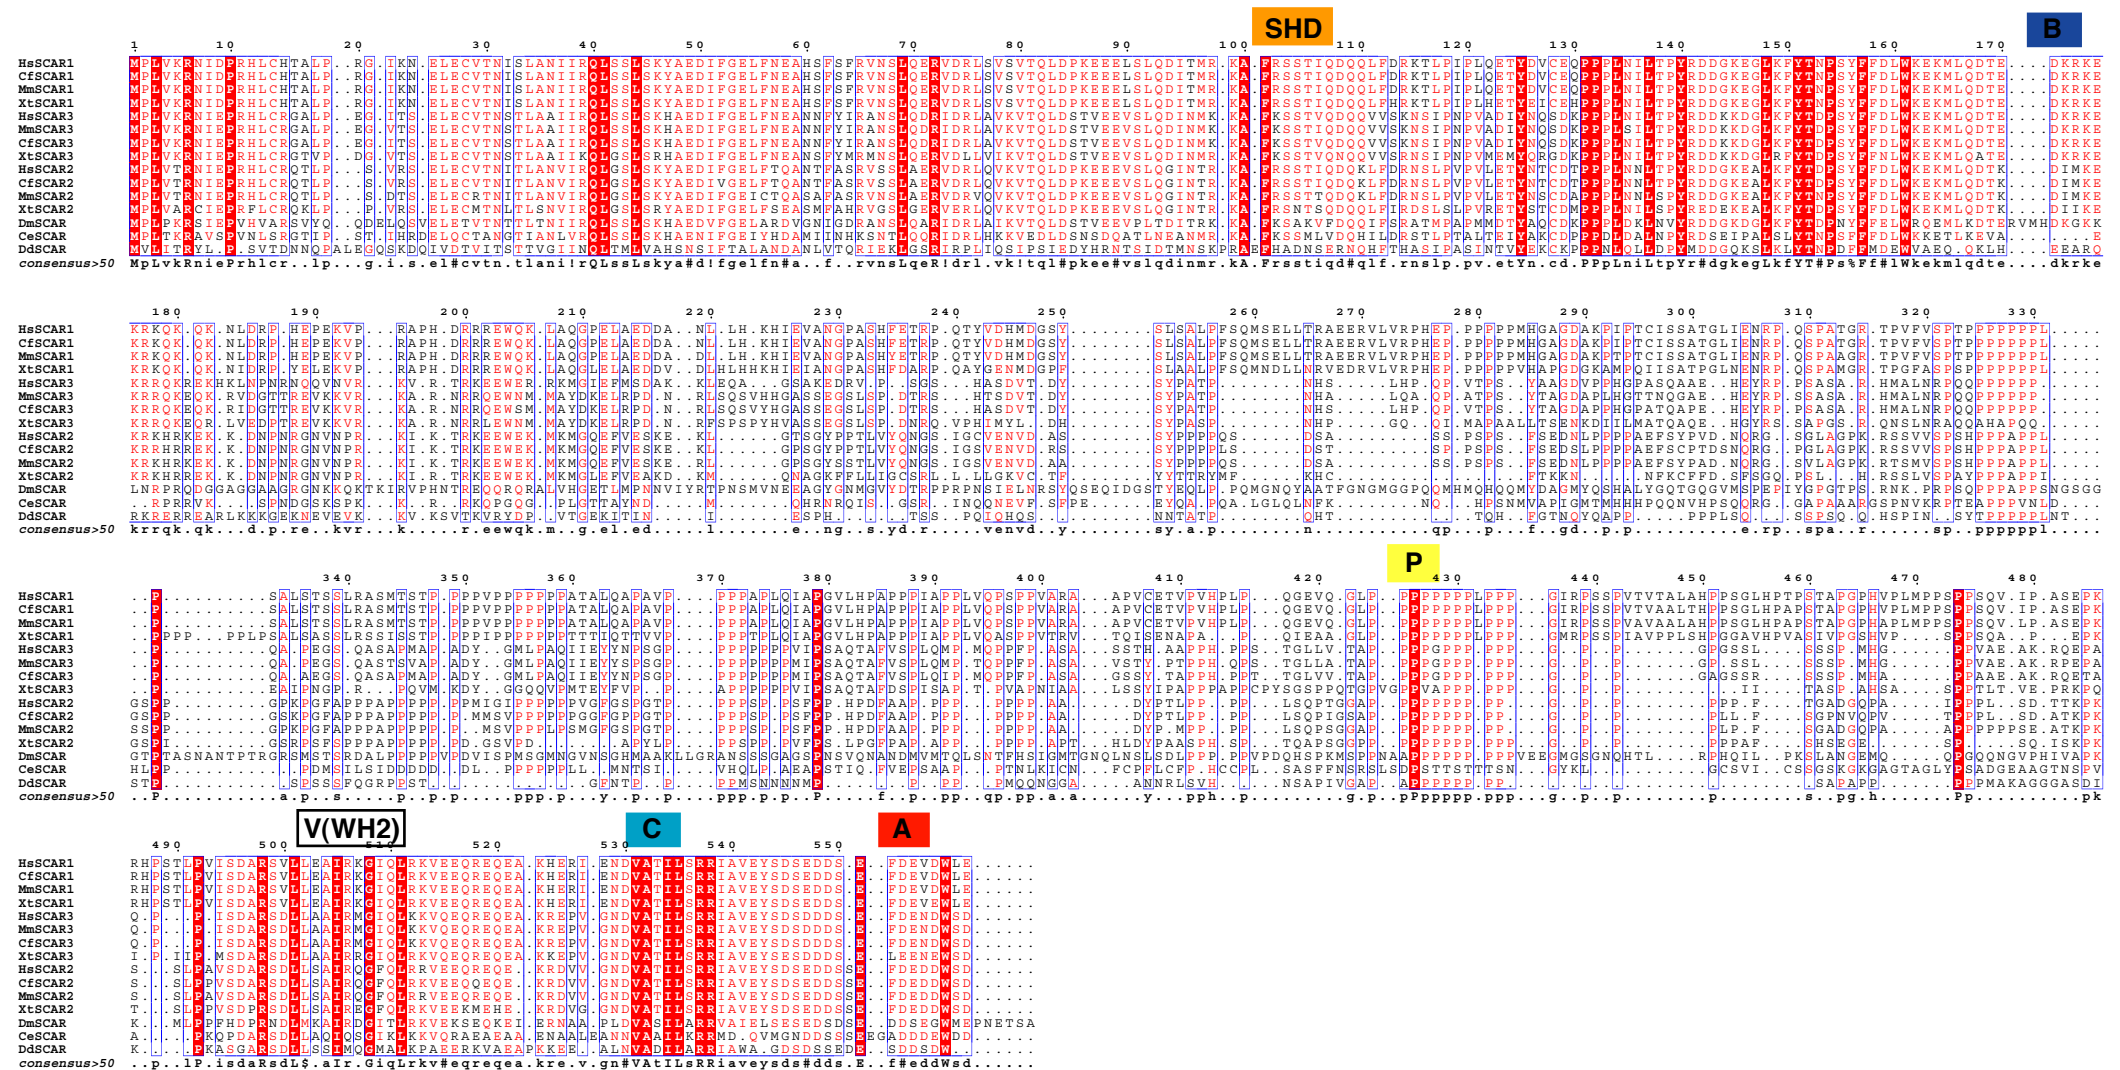

Supplementary Figure S9. Multiple alignment of SCAR (WAVE) orthologs from diverse species. See Supplementary Figure S4 legend for details.
