# Supplementary material
Source: PubMed Central journal article supplement (PMC2323319)
Supplement: pgen.0030237.st001.pdf [file pgen.0030237.st001.pdf]

| HAPLOTYPE SOURCE   | # TOTAL CLONES SEQ'D | EXON | 1                |      | 2    |      | 3    |      |      |      |      | 4    |      |      |      | 6    |      |      |      |      |      |      |      |      |      |      |
|--------------------|----------------------|------|------------------|------|------|------|------|------|------|------|------|------|------|------|------|------|------|------|------|------|------|------|------|------|------|------|
|                    |                      |      | SEQUENCE VARIANT | C/T  | C/T  | A/G  | A/G  | G/C  | G/A  | G/A  | T/C  | C/G  | T/G* | T/C  | T/C  | C/T  | T/C  | G/C  | G/A  | C/T  | C/T  | G/A  | C/T  | G/T  | G/A  | C/T  |
|                    |                      |      | AMINO ACID       | L/F  | AV   | Q/R  | E/G  | T    | G/S  | G/D  | S/P  | P/A  | Y/D* | P    | C    | V    | I    | D/H  | P    | P/S  | P    | A/T  | N    | S/I  | P    | AV   |
|                    |                      |      | GENOMIC CO-ORD   | 163  | 209  | 6632 | 6972 | 7002 | 7003 | 7004 | 7033 | 7059 | 7276 | 7284 | 7290 | 7365 | 8003 | 8004 | 8012 | 8031 | 8033 | 8040 | 8045 | 8059 | 8108 | 8152 |
|                    |                      |      | VARIATION NO.    | 1    | 2    | 3    | 4    | 5    | 6    | 7    | 8    | 9    | 10   | 11   | 12   | 13   | 14   | 15   | 16   | 17   | 18   | 19   | 20   | 21   | 22   | 23   |
| BC048328           | n.a.                 |      | C                | C    | G    | A    | G    | G    | G    | T    | C    | T    | T    | T    | C    | T    | G    | G    | C    | C    | G    | C    | G    | G    | C    |      |
| CHR 20 HYB PANEL A | n.a.                 |      | T                | -    | -    | -    | -    | -    | -    | -    | -    | -    | -    | -    | -    | -    | -    | -    | -    | -    | -    | -    | -    | -    | -    |      |
| CHR 20 HYB PANEL B | n.a.                 |      | T                | T    | -    | -    | -    | -    | -    | -    | G    | C    | C    | -    | -    | -    | A    | -    | -    | -    | -    | T    | A    | -    |      |      |
| CHR 9 ASSEMBLY     | n.a.                 |      | T                | -    | A    | G    | -    | -    | -    | C    | -    | G    | -    | C    | -    | C    | C    | A    | -    | -    | -    | -    | A    | T    |      |      |
| GM10540.genomic.1  | 1/15                 |      | n.d.             | n.d. | n.d. | -    | C    | A    | -    | C    | -    | -    | -    | C    | -    | -    | -    | A    | T    | T    | -    | T    | T    | A    | T    |      |
| GM10540.genomic.2* | 2/15                 |      | n.d.             | n.d. | n.d. | -    | C    | A    | -    | C    | -    | G    | -    | C    | -    | -    | -    | A    | T    | T    | -    | T    | T    | A    | T    |      |
| GM10540.fs9-12.1   | 2/4                  |      | n.d.             | n.d. | n.d. | -    | C    | -    | -    | C    | -    | G    | -    | C    | -    | -    | -    | A    | T    | -    | -    | T    | T    | A    | T    |      |
| GM10540.fs20.1*    | 3/3                  |      | n.d.             | n.d. | n.d. | -    | C    | A    | -    | C    | -    | G    | -    | C    | -    | -    | -    | A    | T    | T    | -    | T    | T    | A    | T    |      |
| GM07791.fs9-12.1   | 3/3                  |      | n.d.             | n.d. | n.d. | -    | C    | -    | -    | C    | -    | G    | -    | C    | T    | -    | -    | A    | T    | -    | -    | T    | T    | A    | T    |      |
| GM07791.fs20.1     | 7/7                  |      | n.d.             | n.d. | n.d. | -    | -    | -    | -    | -    | -    | -    | -    | -    | -    | -    | -    | -    | -    | -    | -    | -    | -    | -    | -    |      |
| GM10494.genomic.1  | 1/10                 |      | n.d.             | n.d. | n.d. | -    | C    | -    | -    | -    | -    | G    | -    | C    | -    | -    | C    | A    | -    | -    | A    | T    | T    | A    | T    |      |
| GM10494.genomic.2  | 1/10                 |      | n.d.             | n.d. | n.d. | -    | -    | -    | -    | C    | -    | G    | -    | C    | -    | -    | C    | A    | -    | -    | -    | -    | T    | A    | T    |      |
| GM10494.genomic.3  | 1/10                 |      | n.d.             | n.d. | n.d. | -    | C    | -    | A    | C    | G    | G    | -    | C    | -    | -    | -    | A    | -    | -    | -    | -    | T    | A    | T    |      |
| GM10494.fs9-12.1   | 2/6                  |      | n.d.             | n.d. | n.d. | -    | C    | -    | -    | C    | -    | G    | -    | C    | -    | -    | -    | A    | T    | -    | -    | T    | T    | A    | T    |      |
| GM10494.fs20.1     | 7/9                  |      | n.d.             | n.d. | n.d. | -    | -    | -    | -    | -    | -    | -    | -    | -    | -    | -    | -    | -    | -    | -    | -    | -    | -    | -    | -    |      |

**Supplementary Table 1.** Locations of sequence variants identified in 14 different WASH ORFs that appear to be intact, at least in coding exons 2-10. We used the cDNA sequence BC048328 as reference; “-“ indicates where a sequence is not different from BC048328. These variants were derived from chromosomes captured in a monochromosomal hybrid panel, certain chromosomes isolated by flow-sorting (20 or 9-12) from three individuals, and copies PCR amplified from genomic DNA (without chromosomal assignment) from the same individuals. Note: Two ORFs in one individual (with asterisks) were identical in coding sequence, but differed by 3% in intronic sequence implying that they derive from different chromosomal locations. n.a., not applicable; n.d., not determined. The SNP highlighted in blue is unconfirmed, as it was observed only once in this survey and is not a variant site in EST sequences in public databases. The variant sequences are provided in fasta format in Supplementary Data File.

| 7       |      |      |      |      | 8    |      |      |      |      |      |      | 9    | 10    |       |       |       |       |       |       |
|---------|------|------|------|------|------|------|------|------|------|------|------|------|-------|-------|-------|-------|-------|-------|-------|
| 9nt/del | T/A  | T/C  | A/G  | G/A  | C/T  | C/T  | G/A  | G/A  | C/G  | A/C  | A/C  | G/C  | G/A   | C/T   | C/T   | C/G/T | G/A   | C/T   | G/C   |
| APP/del | P    | P/S  | S/G  | A    | V    | R/W  | G/S  | V/M  | L/V  | K/Q  | K/Q  | D/H  | G/R   | A/V   | R     | L/V/L | V     | D     | S     |
| 8270    | 8289 | 8320 | 8377 | 8391 | 9086 | 9102 | 9144 | 9165 | 9180 | 9189 | 9192 | 9998 | 10198 | 10235 | 10239 | 10261 | 10263 | 10302 | 10314 |
| 24      | 25   | 26   | 27   | 28   | 29   | 30   | 31   | 32   | 33   | 34   | 35   | 36   | 37    | 38    | 39    | 40    | 41    | 42    | 43    |
| 9nt     | T    | T    | A    | G    | C    | C    | G    | G    | C    | A    | A    | G    | G     | C     | C     | C     | G     | C     | G     |
| -       | -    | -    | -    | -    | -    | -    | -    | -    | -    | -    | -    | -    | -     | -     | -     | -     | -     | -     | -     |
| del     | A    | C    | -    | -    | -    | T    | -    | A    | -    | -    | -    | C    | -     | -     | -     | -     | -     | -     | C     |
| del     | A    | C    | -    | A    | -    | T    | -    | A    | -    | C    | C    | C    | -     | T     | -     | T     | -     | -     | -     |
| del     | A    | C    | -    | -    | -    | T    | A    | A    | -    | -    | C    | C    | -     | -     | -     | -     | -     | -     | n.d.  |
| del     | A    | C    | -    | -    | -    | T    | A    | A    | -    | -    | C    | C    | -     | -     | -     | -     | -     | -     | n.d.  |
| del     | A    | -    | -    | -    | -    | T    | -    | A    | G    | -    | -    | C    | A     | -     | -     | -     | -     | -     | n.d.  |
| del     | A    | C    | -    | -    | -    | T    | A    | A    | -    | -    | C    | C    | -     | -     | -     | -     | -     | -     | n.d.  |
| del     | A    | -    | G    | -    | -    | T    | -    | A    | G    | -    | -    | C    | A     | -     | -     | -     | -     | -     | n.d.  |
| -       | -    | -    | G    | -    | -    | -    | -    | -    | -    | -    | -    | -    | -     | -     | -     | -     | -     | -     | n.d.  |
| del     | A    | C    | -    | -    | -    | T    | -    | A    | G    | -    | -    | C    | A     | -     | -     | G     | -     | C     | n.d.  |
| del     | A    | C    | -    | -    | T    | T    | -    | A    | -    | -    | -    | C    | -     | -     | -     | G     | -     | -     | n.d.  |
| del     | A    | C    | -    | A    | -    | -    | -    | A    | G    | C    | C    | C    | -     | -     | -     | -     | -     | -     | n.d.  |
| del     | A    | C    | -    | -    | -    | T    | -    | A    | G    | -    | -    | C    | A     | -     | T     | -     | A     | -     | n.d.  |
| -       | -    | -    | -    | -    | -    | -    | -    | -    | -    | -    | -    | -    | -     | -     | -     | -     | -     | -     | n.d.  |

|  |                              |
|--|------------------------------|
|  | Synonymous Substitutions     |
|  | Non-Synonymous Substitutions |
|  | Stop/Frameshift Mutations    |
|  | SNPs without support         |
